# Supplementary material for: Reduced CD27−IgD− B Cells in Blood and Raised CD27−IgD− B Cells in Gut-Associated Lymphoid Tissue in Inflammatory Bowel Disease
Source: Front Immunol. 2019 Mar 5;10:361. doi: 10.3389/fimmu.2019.00361 (PMC6411645; doi:10.3389/fimmu.2019.00361)
Supplement: Supplementary file 1 [file Data_Sheet_1.pdf]

## Supplemental Table 1

|                       | HC          | UC          | CD          |
|-----------------------|-------------|-------------|-------------|
| Male                  | 9           | 8           | 19          |
| Female                | 13          | 9           | 16          |
| Age                   | 43.86±13.79 | 33.47±13.05 | 38.77±13.69 |
| CRP (mg/L)            | -           | 3.64±6.11   | 8.8±12.3    |
| Active disease        | -           | 6           | 9           |
| Remission             | -           | 11          | 22          |
| Infliximab (Remsima)  | -           | 2           | 8           |
| Vedolizumab (Entyvio) | -           | 5           | 1           |
| Ustekinumab (Stelara) | -           | -           | 16          |
| Corticosteroid        | -           | 4           | 6           |
| DMARD                 | -           | 5           | 8           |

**Supplemental Table 1.** Characteristics and medication of patients enrolled in the study of blood cells. DMARD: Disease-modifying anti-rheumatic drugs.

## Supplemental Table 2

|                         | HC(mc)    | HC(c)     | UC(mc)    | CD(mc) | CD(c)     |
|-------------------------|-----------|-----------|-----------|--------|-----------|
| Male                    | 4         | 2         | 3         | -      | 2         |
| Female                  | 2         | 5         | 3         | 1      | 1         |
| Age (average and range) | 60(47-71) | 45(25-80) | 46(30-75) | 45     | 34(31-36) |
| Corticosteroid          | -         | -         | 2         | 1      | nd        |
| Immunosuppressant       | -         | -         | 4         | -      | nd        |
| DMARD                   | -         | -         | 2         | -      | nd        |

**Supplemental Table 2.** Characteristics of patients enrolled in the study of cells isolated from biopsies. DMARD: Disease-modifying anti-rheumatic drugs. nd= no data available. (mc) = biopsies used for mass cytometry. (c) = biopsies used for analysis of cytokine production by B cells in GALT.

### Supplemental Table 3

| Manufacturer   | Antibody                  | Clone     | Concentration |
|----------------|---------------------------|-----------|---------------|
| Miltenyibiotec | IgA PE                    | IS11-8E10 | 0.5mg/ml      |
| Biolegend      | IgD APC-Cy7               | IA6-2     | 200µg/ml      |
| Biolegend      | IgM BV605                 | MHM-88    | 160µg/ml      |
| Biolegend      | β7 FITC                   | FIB504    | 0.5mg/ml      |
| Biolegend      | CD10 BV421                | HI10a     | 25µg/ml       |
| Biolegend      | CD19 PerCP Cy5.5          | HIB19     | 200µg/ml      |
| Biolegend      | CD27 BV711                | M-T271    | 50µg/ml       |
| Biolegend      | IL10 APC                  | JES3-19F1 | 20µg/ml       |
| Biolegend      | TNF-α Pacific Blue        | MAb11     | 0.5mg/ml      |
| Biolegend      | Mouse IgG1 κ, BV711       | MOPC-21   | 100µg/ml      |
| BD Biosciences | Mouse IgG1 κ, PerCP Cy5.5 | MOPC-21   | 0.2mg/ml      |
| Biolegend      | Mouse IgG1 κ, APC         | MOPC-21   | 0.2mg/ml      |
| Biolegend      | Rat IgG2a, κ FITC         | RTK2759   | 0.5mg/ml      |
| BD Pharmingen  | Mouse IgG1 κ PE           | MOPC-21   | 0.2mg/ml      |

**Supplemental Table 3.** Antibodies used for flow cytometry.

Supplemental Table 4

| Population description<br>(out of total CD19+)      | Population interpretation                   | Flow criteria for blood                                               | Mass cytometry gating criteria                       |
|-----------------------------------------------------|---------------------------------------------|-----------------------------------------------------------------------|------------------------------------------------------|
| Transitional                                        | Transitional                                | CD27 <sup>-</sup> IgM <sup>+</sup> IgD <sup>+</sup> CD10 <sup>+</sup> | <sup>^</sup> CD27 <sup>-</sup> CD10 <sup>+</sup>     |
| Naive                                               | Naive                                       | CD27 <sup>-</sup> IgM <sup>+</sup> IgD <sup>+</sup> CD10 <sup>-</sup> | CD10 <sup>-</sup> CD27 <sup>-</sup> IgD <sup>+</sup> |
| Marginal zone                                       | Marginal zone                               | CD27 <sup>+</sup> IgM <sup>+</sup> IgD <sup>+</sup>                   | CD10 <sup>-</sup> CD27 <sup>+</sup> IgD <sup>+</sup> |
| CD27 <sup>+</sup> IgA <sup>+</sup>                  | Classical IgA memory                        | CD27 <sup>+</sup> IgA <sup>+</sup>                                    | CD10 <sup>-</sup> CD27 <sup>+</sup> IgD <sup>-</sup> |
| *CD27 <sup>+</sup> IgG <sup>+</sup>                 | Classical IgG memory                        | CD27 <sup>+</sup> IgA <sup>-</sup> IgM <sup>-</sup>                   | CD10 <sup>-</sup> CD27 <sup>+</sup> IgD <sup>-</sup> |
| IgM only                                            | Mixture of marginal zone and memory B cells | CD27 <sup>+</sup> IgM <sup>+</sup> IgD <sup>-</sup>                   | CD10 <sup>-</sup> CD27 <sup>+</sup> IgD <sup>-</sup> |
| CD27 <sup>-</sup> IgA <sup>+</sup>                  | Non-classical IgA memory                    | CD27 <sup>-</sup> IgM <sup>-</sup> IgD <sup>-</sup> IgA <sup>+</sup>  | CD10 <sup>-</sup> CD27 <sup>-</sup> IgD <sup>-</sup> |
| *CD27 <sup>-</sup> IgG <sup>+</sup>                 | Non-classical IgG memory                    | CD27 <sup>-</sup> IgM <sup>-</sup> IgD <sup>-</sup> IgA <sup>-</sup>  | CD10 <sup>-</sup> CD27 <sup>-</sup> IgD <sup>-</sup> |
| CD27 <sup>-</sup> IgM <sup>+</sup> IgD <sup>-</sup> | Non-classical IgM memory                    | CD27 <sup>-</sup> IgM <sup>+</sup> CD10 <sup>-</sup> IgD <sup>-</sup> | CD10 <sup>-</sup> CD27 <sup>-</sup> IgD <sup>-</sup> |
| Germinal centre                                     |                                             | Not applicable                                                        | <sup>^</sup> CD27 <sup>+</sup> CD10 <sup>+</sup>     |

**Supplemental Table 4.** B cell subset gating and population descriptions. B cell subsets are colour coded to cross reference with **Figure 1** and **Figure 3**. \*Preliminary data justifying the designation of IgM<sup>-</sup>IgA<sup>-</sup> (IgD<sup>-</sup>) cells as IgG<sup>+</sup> is shown in **Supplemental Figure 2**. <sup>^</sup>Note that the CD19<sup>+</sup>CD10<sup>+</sup> populations were not used for analysis of subsets according to expression of CD27 and IgD because the majority of CD10<sup>+</sup> cells in the gut are germinal centre cells that have no equivalent in blood.

## Supplemental Table 5

| Antibody                         | Clone    | Metal Tag | Dilution | Supplier  |
|----------------------------------|----------|-----------|----------|-----------|
| Anti-Human CD10                  | HI10a    | 158Gd     | 1:200    | Fluidigm  |
| Anti-Human CD11c                 | Bu15     | 147Sm     | 1:200    | Fluidigm  |
| Anti-Human CD127 (IL-7Ra)        | A019D5   | 143Nd     | 1:200    | Fluidigm  |
| Anti-Human CD138 (Syndecan-1)    | DL-101   | 150Nd     | 1:200    | Fluidigm  |
| Anti-Human CD185 (CXCR5)         | RF8B2    | 153Eu     | 1:200    | Fluidigm  |
| Anti-Human CD19                  | HIB19    | 142Nd     | 1:200    | Fluidigm  |
| Anti-Human CD197 (CCR7)          | G043H7   | 159Tb     | 1:200    | Fluidigm  |
| Anti-Human CD20                  | 2H7      | 171Yb     | 1:200    | Fluidigm  |
| Anti-Human CD24                  | ML5      | 166Er     | 1:100    | Fluidigm  |
| Anti-Human CD25                  | 2A3      | 169Tm     | 1:100    | Fluidigm  |
| Anti-Human CD268 (BAFFR)         | 11C1     | 155Gd     | 1:200    | Fluidigm  |
| Anti-Human CD27                  | L128     | 167Er     | 1:200    | Fluidigm  |
| Anti-Human CD274 (PDL1)          | 29E.2A3  | 175Lu     | 1:200    | Fluidigm  |
| Anti-Human CD278 (ICOS)          | C398.4A  | 151Eu     | 1:200    | Fluidigm  |
| Anti-Human CD279 (PD-1)          | EH12.2H7 | 174Yb     | 1:200    | Fluidigm  |
| Anti-Human CD28                  | CD28.2   | 160Gd     | 1:200    | Fluidigm  |
| Anti-Human CD3                   | UCHT1    | 154Sm     | 1:200    | Fluidigm  |
| Anti-Human CD38                  | HIT2     | 144Nd     | 1:200    | Fluidigm  |
| Anti-Human CD4                   | RPA-T4   | 176Yb     | 1:200    | Fluidigm  |
| Anti-Human CD45                  | HI30     | 89Y       | 1:200    | Fluidigm  |
| Anti-Human CD45RB                | MEM-55   | 145Nd     | 1:100    | Fluidigm  |
| Anti-Human CD45RO                | UCHL1    | 149Sm     | 1:200    | Fluidigm  |
| Anti-Human CD8                   | SK1      | 168Er     | 1:200    | Fluidigm  |
| Anti-Human CD80/B7-1             | 2D10.4   | 161Dy     | 1:200    | Fluidigm  |
| Anti-Human CD86/B7.2             | IT2.2    | 156Gd     | 1:200    | Fluidigm  |
| Anti-Human IgD                   | IA6-2    | 146Nd     | 1:200    | Fluidigm  |
| Anti-Human IgM                   | MHM-88   | 172Yb     | 1:100    | Fluidigm  |
| Goat Anti-Human IgA (polyclonal) | -        | 148Nd     | 1:200    | Fluidigm  |
| Goat Anti-human IgG (polyclonal) | -        | 141Pr     | 1:100    | Fluidigm  |
| Anti-human CD40                  | 5C3      | 162Dy     | 1:200    | Biolegend |
| Anti-human CD154 (CD40L)         | 24-31    | 152Sm     | 1:200    | Biolegend |
| Anti-human CD269 (BCMA)          | 19F2     | 173Yb     | 1:100    | Biolegend |
| Anti-human CD267 (TACI)          | 1A1      | 164Dy     | 1:200    | Biolegend |
| Anti-human CD307d (FcRL4)        | 413D12   | 170Er     | 1:200    | Biolegend |
| Anti-human CD180 (RP105)         | MHR73-11 | 163Dy     | 1:200    | Biolegend |
| Anti-human CD307e (FcRL5)        | 509F6    | 165Ho     | 1:200    | Biolegend |

**Supplemental Table 5.** Antibodies used for mass cytometry.

Supplemental Figure 1

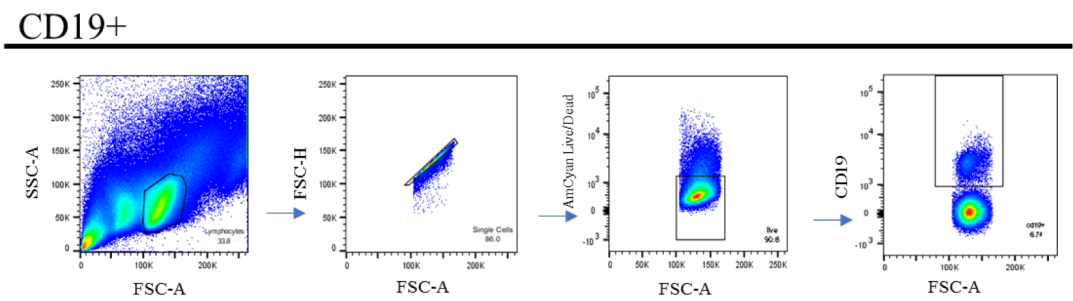

**Supplemental Figure 1.** Details of gating preceding the gating of B cell subsets from blood illustrated in **Figure 1**.

## Supplemental Figure 2

A

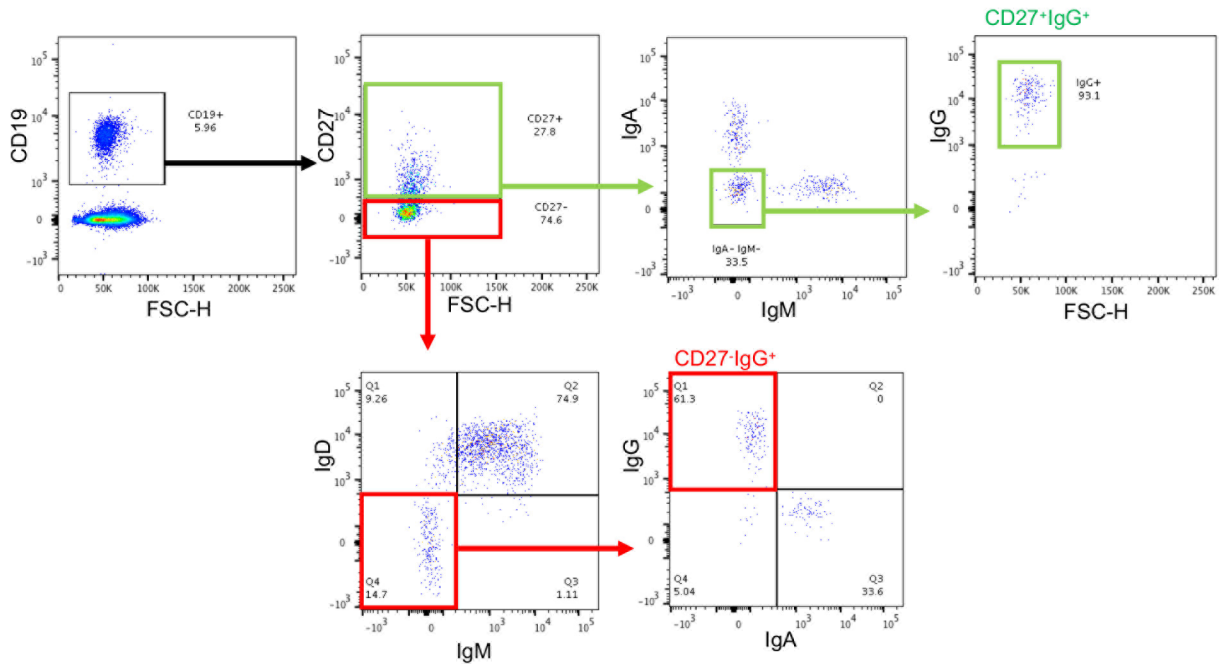

B

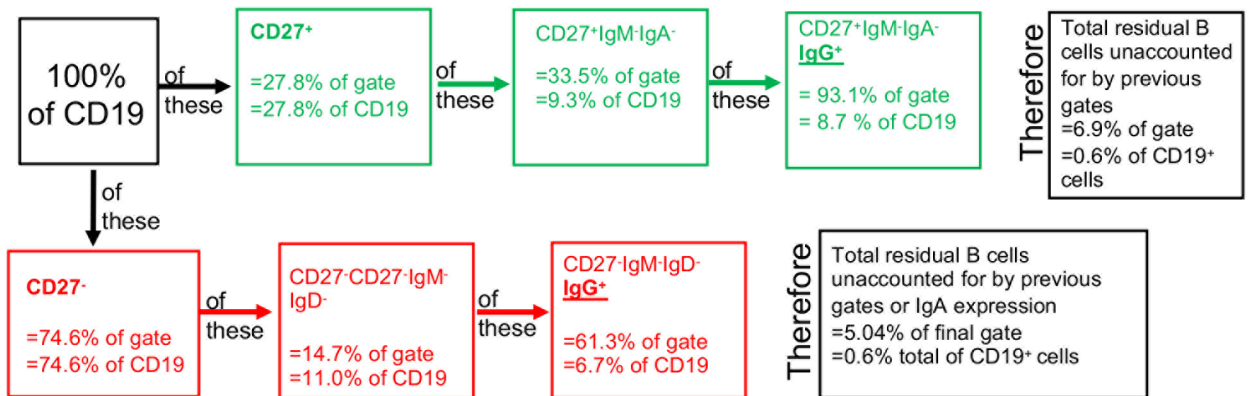

**Supplemental Figure 2. Gating of IgG<sup>+</sup> cells.** Preliminary experiments demonstrated that IgM-IgA<sup>-</sup> B cells were almost exclusively IgG<sup>+</sup>. For this reason IgG was not used in the flow panel and IgM-IgA<sup>-</sup> (IgD<sup>-</sup>) cells are referred to as IgG<sup>+</sup> in the manuscript for simplicity. A. An example of gating strategy that includes IgG. B. a flow chart linked to the numbers in the quadrants in A. Showing that by including all isotypes in the gating panel only approximately 1% of CD19<sup>+</sup> cells cannot be accounted for and these are split evenly between those that originated from the CD27<sup>+</sup> gate and the CD27<sup>-</sup> gate.

## Supplemental Figure 3

A

CD27/IgD population gating

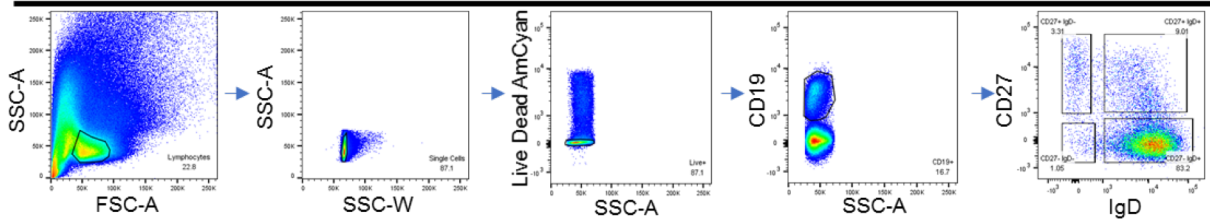

B

TNF $\alpha$ /IL10 intracellular staining of CD27/IgD populations

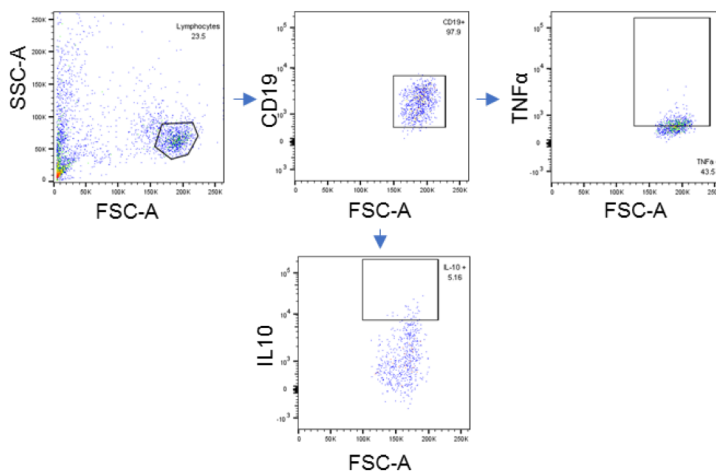

**Supplemental Figure 3. Analysis of cytokine production by sorted B cell subsets.** A. Scheme for gating of CD27<sup>+</sup>IgD<sup>-</sup>, CD27<sup>+</sup>IgD<sup>+</sup>, CD27<sup>-</sup>IgD<sup>-</sup> and CD27<sup>-</sup>IgD<sup>+</sup> cells for sorting. B. Analysis of cytokine production by sorted cells.

## Supplemental Figure 4

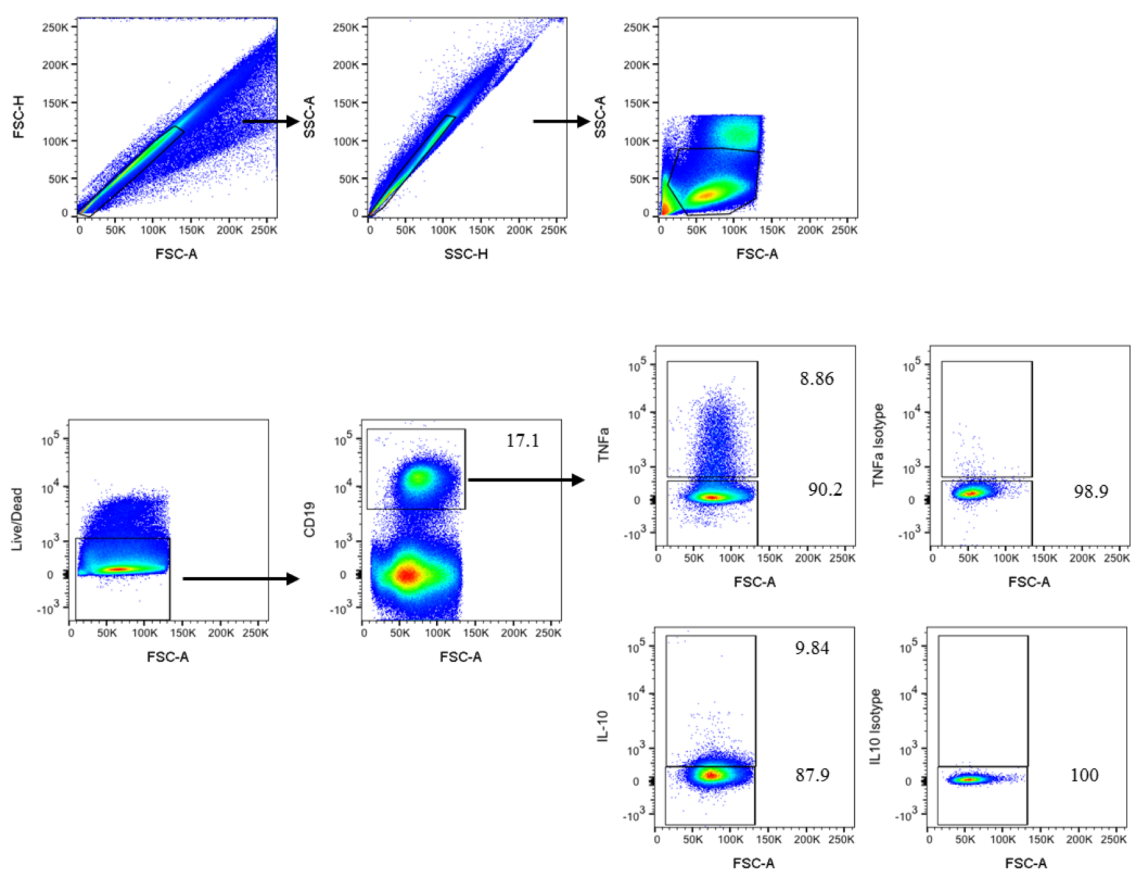

**Supplemental Figure 4.** Gating strategy for analysis of TNF $\alpha$  and IL-10 production by total CD19<sup>+</sup> populations

## Supplemental Figure 5

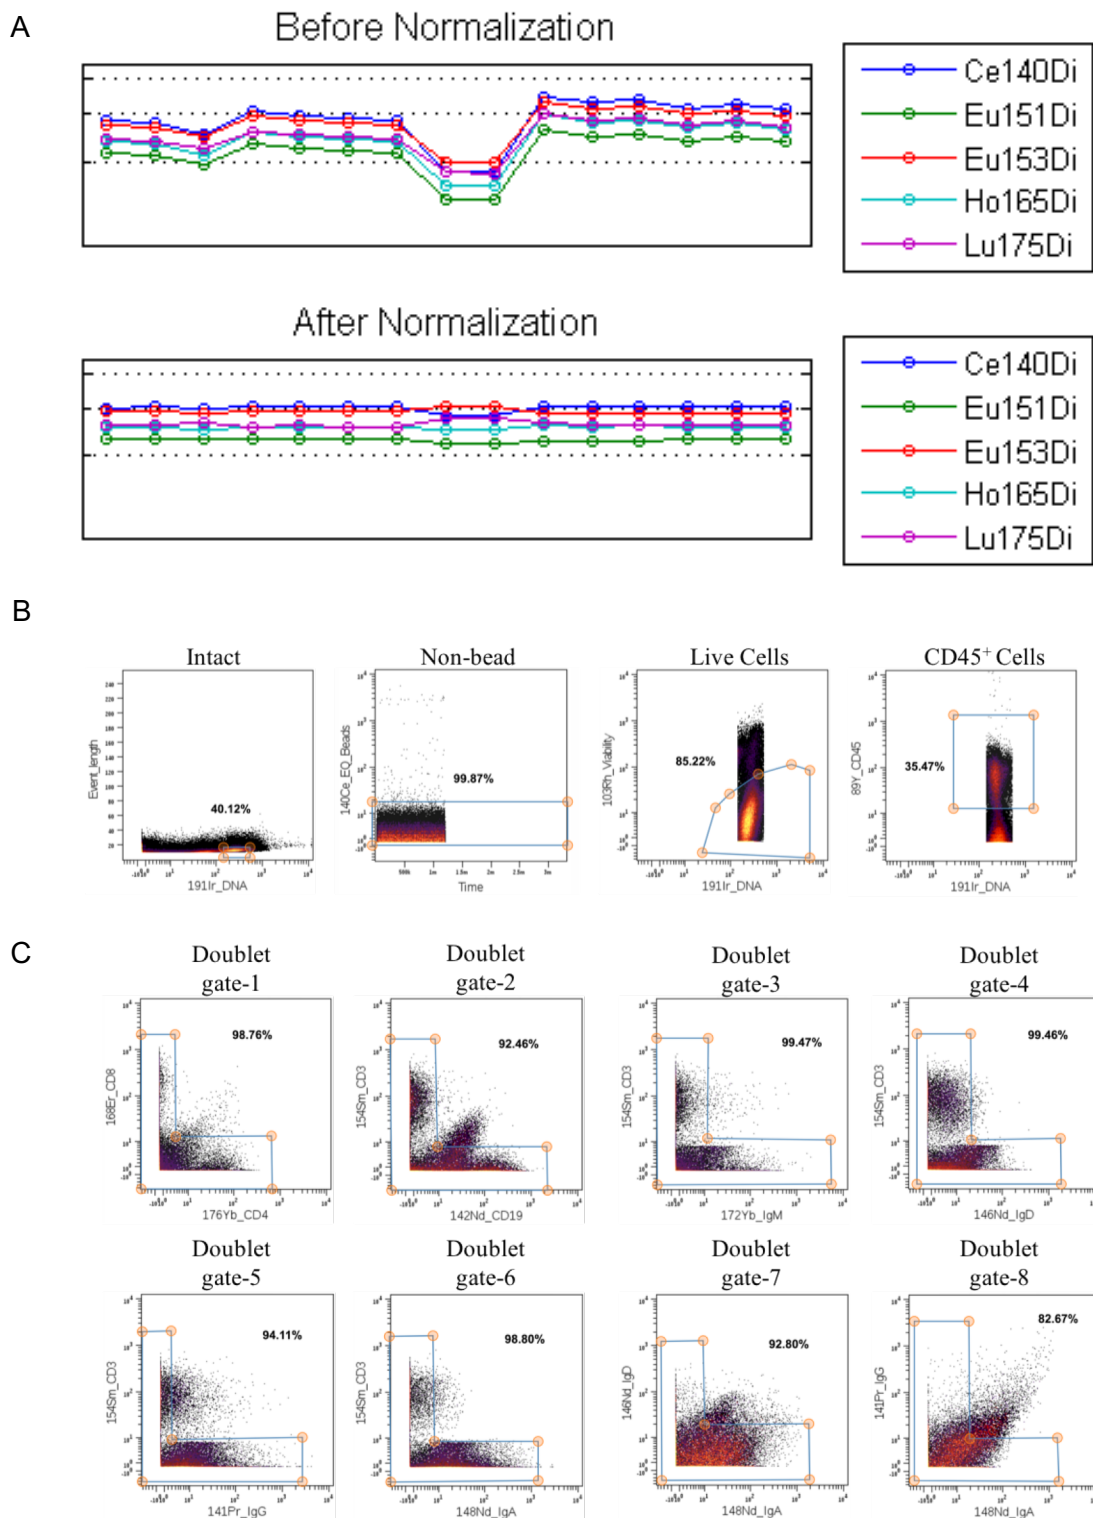

**Supplemental Figure 5. Quality control and preliminary gating for mass cytometry.**

A. Bead normalization. B. Preliminary gating for analysis of CD45<sup>+</sup> cells isolated from GALT. A gate was created around intact cells that ensured that all relevant events were captured. C. Subsequent gates cells excluded doublets and the remaining minority of cells with implausible marker combinations.

## Supplemental Figure 6

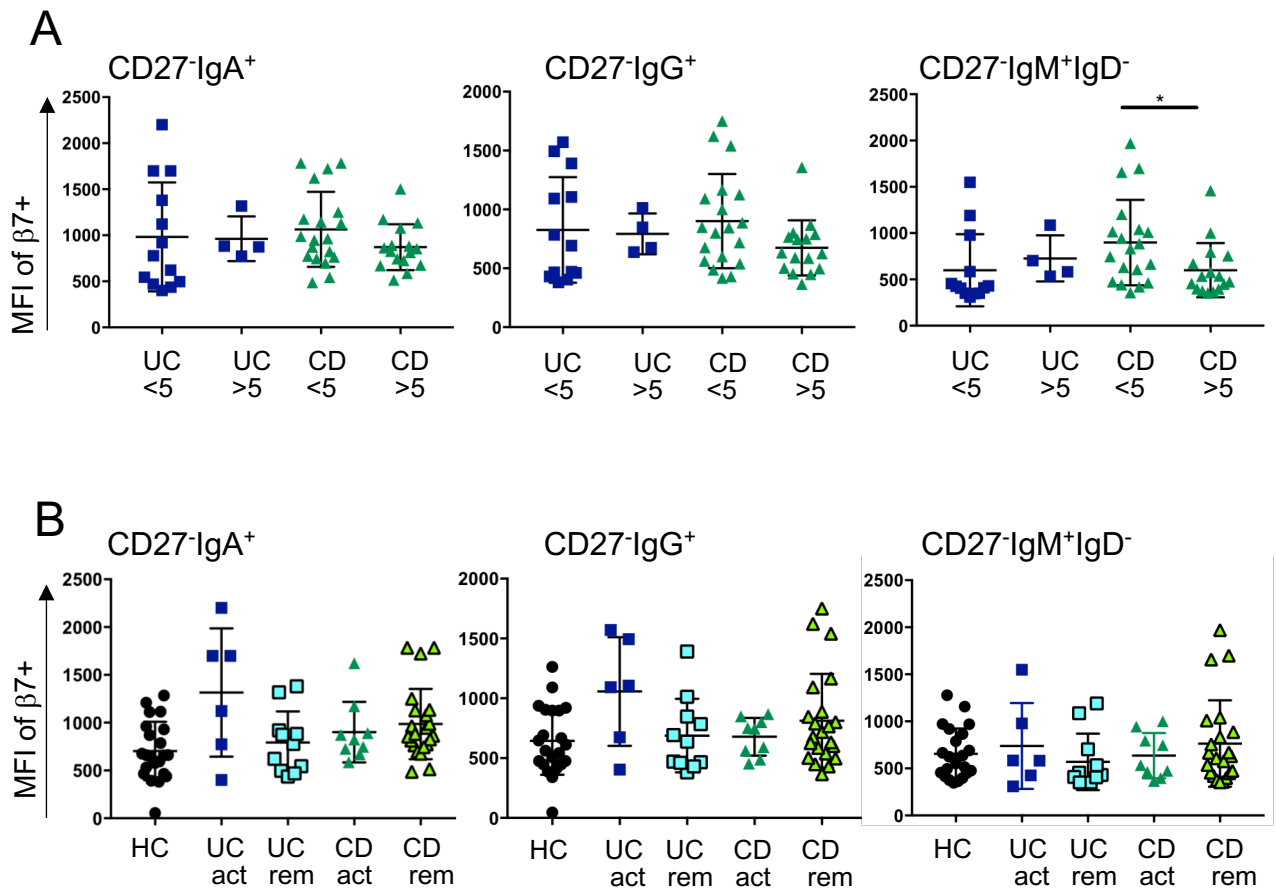

**Supplemental Figure 6. MFI of  $\beta 7$  integrin expression by blood CD27-IgD<sup>-</sup> subsets in CD and UC patients stratified according to CRP levels and remission status.** The MFI of  $\beta 7$  expression by three subsets of CD27-IgD<sup>-</sup> B cells (CD27-IgA<sup>+</sup>, CD27-IgG<sup>+</sup> and CD27-IgM<sup>+</sup>). For A, the values of <5 and >5 refer to CRP levels. UC<5 n=13, UC>5 n=4, CD<5 n=19, CD>5 n=16; for B, 'act' refs to active disease and 'rem' to remission. HC n=22, UC active n=6, UC remission n=11, CD active n=9 and CD remission n=22. Data is analysed by Mann-Whitney U test where  $p < 0.05 = *$ .
